# Supplementary material for: The 14C dose assessment model chain – 14C source term definition and uncertainty quantification
Source: Copernicus journal article supplement (doi:10.5194/sand-2-97-2023), 2023-09-06
Supplement: Supplementary file 1 [file sand-2-97-2023-supplement.pdf]

Supplement of Saf. Nucl. Waste Disposal, 2, 97–97, 2023  
<https://doi.org/10.5194/sand-2-97-2023-supplement>  
© Author(s) 2023. CC BY 4.0 License.



*Supplement of*

## **The $^{14}\text{C}$ dose assessment model chain – $^{14}\text{C}$ source term definition and uncertainty quantification**

**Susanne Pudollek et al.**

*Correspondence to:* Susanne Pudollek ([susanne.pudollek@nagra.ch](mailto:susanne.pudollek@nagra.ch))

The copyright of individual parts of the supplement might differ from the article licence.

# THE $^{14}\text{C}$ DOSE ASSESSMENT MODEL CHAIN – $^{14}\text{C}$ SOURCE TERM DEFINITION AND UNCERTAINTY QUANTIFICATION

SafeND, Berlin, 14.09.2023

Susanne Pudollek, Valentyn Bykov, Typhaine Guillemot, Xiaoshuo Li

**nagra** ●

# SWISS REPOSITORY CONCEPT



# IMPORTANCE OF $^{14}\text{C}$

---

- Just a small number of nuclides are relevant for long term post closure dose
  - Focus today:  $^{14}\text{C}$ 
    - ➔ release from waste into fluid and gas phase ➔ high mobility within geosphere
    - ➔ half life of ca. 5700 a,
    - ➔ C relevant as building block within biosphere
- Probabilistic dose assessments
  - Realistic modeling enables assessment of systems's robustness
  - Requires realistic input and parameter setting for models to
  - **Goal** throughout  $^{14}\text{C}$  model chain: **best estimate + uncertainty**

# 14C MODEL CHAIN

Reactor waste,  
NPP Gösgen



Reprocessing coquille



Model of a concrete container

**14C inventory**

# $^{14}\text{C}$ MODEL CHAIN



**Release & Speciation from each material**

**$^{14}\text{C}$  inventory**



# <sup>14</sup>C MODEL CHAIN



Time 2.0E+04 [yrs]

**Transport within repository**

**Release & Speciation from each material**



**<sup>14</sup>C inventory**



# <sup>14</sup>C MODEL CHAIN



**Transport to biosphere**



**Transport within repository**

**Release & Speciation from each material**



**<sup>14</sup>C inventory**



# <sup>14</sup>C MODEL CHAIN



**Transport within biosphere**

**Transport to biosphere**

**Transport within repository**

**Release & Speciation from each material**

**<sup>14</sup>C inventory**



# <sup>14</sup>C MODEL CHAIN



<sup>14</sup>C dose

Transport within biosphere

Transport to biosphere

Transport within repository

Release & Speciation from each material

<sup>14</sup>C inventory



# MIRAM-RBG – MODEL INVENTORY

## MIRAM (Model Inventory of Radioactive Materials)

- Basis for **long-term safety analyses**
- Detailed **average properties** of reference package at time of production  
→ **waste package type = AGT**
  - nuclide and material inventory, metal geometries and waste properties
- Based on **ISRAM**: **database of existing waste packages** + model types for future waste
  - used by all waste producers in CH and Nagra for radioactive material management.



Example of waste package type

Abfallbehälter (200 l)

Zusatzbehälter (1000 l)



# **<sup>14</sup>C – INVENTORY**

---

DISTRIBUTION OF THE C-14 ACTIVITY IN HLW AND L/ILW



- 87% of total <sup>14</sup>C-activity in 10 AGTs (waste package types)
- 76% of total <sup>14</sup>C-activity in HLW → 6 AGTs describing SFA

# <sup>14</sup>C – HLW-INVENTORY



- Inventory based on single SFA-calculations
  - emphasis on **full repository inventory best estimate**  
→ nominal AGT inventory
- Inventory given for
  - Fuel itself
  - Active-length structural parts (e.g. cladding)
  - Additional structural parts (e.g. top and bottom end-pieces)
  - Allows material specific attribution of <sup>14</sup>C-activity

# <sup>14</sup>C – HLW – UNCERTAINTY QUANTIFICATION

- Sources considered
  - Nuclear Data
  - Material impurities
  - Design parameters, operating parameters and history
- Perturbation calculations for representative SFA
- Distribution of activity



# <sup>14</sup>C – L/ILW-INVENTORY

## DISTRIBUTION OF C-14 IN L/ILW

### BY WASTE ORIGIN

- WA – REPROCESSING
- SA – DECOMMISSIONING
- BA – OPERATIONAL
- RA – REACTOR WASTE



# <sup>14</sup>C – L/ILW-INVENTORY

Distribution of <sup>14</sup>C by material – activated metals



<sup>14</sup>C is primarily formed by the activation of <sup>14</sup>N impurities present in metals, mainly steel.

| Precursor isotope | Nuclear reaction                     | Isotopic abundance (%) |
|-------------------|--------------------------------------|------------------------|
| <sup>14</sup> N   | <sup>14</sup> N(n,p) <sup>14</sup> C | 99.632                 |
| <sup>17</sup> O   | <sup>17</sup> O(n,α) <sup>14</sup> C | 0.038                  |
| <sup>13</sup> C   | <sup>13</sup> C(n,γ) <sup>14</sup> C | 1.07                   |

# $^{14}\text{C}$ – ACTIVATED METALS - INVENTORY FROM NPPS



- Detailed activation calculations by Nagra
- Main **source of  $^{14}\text{C}$**  – Core Internals
- Main **source of uncertainties**
  - Material composition = N-impurities
  - Approach for  $^{14}\text{C}$ :
    - **Best estimate** based on measurements where available, literature review and estimates based on expert knowledge
    - **Upper confidence limit** based on **expert knowledge** → «highest known» N-impurity

# <sup>14</sup>C – L/ILW-INVENTORY

Distribution of <sup>14</sup>C by material – contaminated waste



# **<sup>14</sup>C – CONTAMINATED WASTE - INVENTORY FROM MIR**

---

- Detailed inquiry into
  - <sup>14</sup>C-waste producers
  - <sup>14</sup>C-waste properties
  - **Estimations of future waste production and expected <sup>14</sup>C-activities**
    - main source of uncertainty → **best-estimate \* («expert knowledge based» factor)**
- Spent fuel research
  - contaminated metallic, inorganic and organic waste
- Medicinal research → <sup>14</sup>C-labeling
  - contaminated organic waste
  - use in rapid decline (<sup>3</sup>H-labeling as main alternative)
- Military equipment – luminiscencing paints/colours
  - BaCO<sub>3</sub>
  - existing old equipment amount reassessed → replaced nowadays by <sup>3</sup>H and alternatives

# $^{14}\text{C}$ SOURCE TERM

- from inventory to transport model source term
  - Release rate
  - Released species
  - Dependent on  $^{14}\text{C}$ -containing material in repository conditions
- CAST-Project → basis of international state of knowledge 
- IGD-TP LOMIR → Long term monitoring of  $^{14}\text{C}$  compounds released during corrosion of irradiated steel
  - (new) Partners welcome!

# SPECIATION AND RELEASE OF $^{14}\text{C}$ FROM L/ILW



# SPECIATION AND RELEASE OF $^{14}\text{C}$ FROM HLW



# SUMMARY - $^{14}\text{C}$ SOURCE TERM QUANTIFICATION



Goal → **realistic assessment base**

→ **Best estimate + uncertainty**

- Assumptions of  $^{14}\text{C}$  speciation and release are based on material
- $^{14}\text{C}$  inventory (best estimate + unc.) captured in model inventory per waste type
- For each waste type  $^{14}\text{C}$  was assigned to one main  $^{14}\text{C}$ -bearing material

➤ **Comprehensive source term of  $^{14}\text{C}$ -species** and activities for the dose assessment model chain



**THANK YOU FOR YOUR ATTENTION**

**QUESTIONS?**

**nagra** ●
